# Supplementary material
Source: publisher site journal article supplement (https://www.dovepress.com/article/425576)
Supplement: Supplementary file 1 [file get_supplementary_file.php]

Supplementary Table 1. The detailed search terms of Web of Science

---

|    | Search terms                                                                                                                                                                                                                                                                                                                                                                                                                   |
|----|--------------------------------------------------------------------------------------------------------------------------------------------------------------------------------------------------------------------------------------------------------------------------------------------------------------------------------------------------------------------------------------------------------------------------------|
| #1 | “multimorbidity” OR “multi-morbidity” OR “multiple morbidity” OR “multiple chronic diseases” OR “multiple chronic illnesses” OR “multiple chronic disorders” OR “chronic conditions” (Topic)                                                                                                                                                                                                                                   |
| #2 | “care” OR “healthcare” OR “health care” OR “management” OR “service” OR “services” OR “model” OR “framework” OR “principle” OR “strategy” OR “element” OR “program” OR “programme” OR “intervention” OR “facilitator” OR “perception” OR “perspective” OR “view” OR “need” OR “demand” OR “experience” OR “barrier” OR “challenge” OR “outcome” OR “adverse event” OR “adverse consequence” OR “cost” OR “utilization” (Topic) |
| #3 | “old” OR “older” OR “oldest” OR “elder” OR “elderly” OR “aged” OR “aging” OR “senior” OR “geriatric” (Topic)                                                                                                                                                                                                                                                                                                                   |
| #4 | “protocol” (Title)                                                                                                                                                                                                                                                                                                                                                                                                             |
| #5 | #1 AND #2 AND #3 NOT #4                                                                                                                                                                                                                                                                                                                                                                                                        |

All results were limited by study design: review; language: English; publication date: database inception-February 2022.

---

Supplementary Table 2. Characteristics of included studies (n=20)

| Author and year of publication                 | Country         | Aim                                                                                                                                                        | Study population and sample size (if applicable)                                                                                                            | Methodology                                                                                                                                       | Concept                                  |
|------------------------------------------------|-----------------|------------------------------------------------------------------------------------------------------------------------------------------------------------|-------------------------------------------------------------------------------------------------------------------------------------------------------------|---------------------------------------------------------------------------------------------------------------------------------------------------|------------------------------------------|
| American Geriatrics Society Expert Panel, 2012 | USA             | To describe guiding principles for the clinical management of older people with MM.                                                                        | Older people with MM                                                                                                                                        | Systematic search and review+expert consensus                                                                                                     | Clinical management and decision support |
| Lehnert, 2011                                  | Germany         | To investigate the relationship between MCCs and health care utilization and costs for elderly persons with MCCs.                                          | Elderly persons with MCCs                                                                                                                                   | Systematic review (35 primary cross-sectional or longitudinal studies were included; the publication date limitation was database inception-2010) | Healthcare utilization and costs         |
| Pel-Littel, 2021                               | The Netherlands | To describe barriers and facilitators for shared decision making as experienced by older patients with MCCs, informal caregivers and health professionals. | 2990 older patients ≥65 years with more than two chronic conditions, 337 informal caregivers, and 527 health professionals (medical staff, nurses and other | Systematic review (28 quantitative, qualitative, and mix-method studies were included; the publication date limitation was 1980-2019)             | Shared decision making                   |

---

|                |           |                                                                                                                                                                                                                                                                                                                                                       |                                                          |                                                                                                             |                                                   |
|----------------|-----------|-------------------------------------------------------------------------------------------------------------------------------------------------------------------------------------------------------------------------------------------------------------------------------------------------------------------------------------------------------|----------------------------------------------------------|-------------------------------------------------------------------------------------------------------------|---------------------------------------------------|
| Aggarwal, 2020 | UK        | To give an up-to-date account of the recognition and management of MM and polypharmacy in the older person.                                                                                                                                                                                                                                           | professionals)<br>Older persons with MM and polypharmacy | Systematic search and review (the publication date limitation was 2003-2020)                                | Recognition and management of MM and polypharmacy |
| Tinetti, 2016  | USA       | To identify modifiable contributors to fragmented and burdensome care; explore approaches that might address these contributors; provide experts' perspectives on challenges to, and opportunities for, addressing these contributors; and identify the core elements for building a feasible, sustainable approach to improve the care and outcomes. | Older adults with MCCs                                   | Literature review+stakeholder discussion                                                                    | Patient priority, decision making, and healthcare |
| Sendall, 2016  | Australia | To identify the components of the chronic care model required to support healthcare that transitions seamlessly between hospital                                                                                                                                                                                                                      | Older people ≥65 years with two or more chronic diseases | Systematic search and review (4 primary quantitative studies were included; the publication date limitation | Transition care                                   |

---

---

|               |         |                                                                                                                                                              |                                                                           |                                                                                                                                                                             |                                                                       |
|---------------|---------|--------------------------------------------------------------------------------------------------------------------------------------------------------------|---------------------------------------------------------------------------|-----------------------------------------------------------------------------------------------------------------------------------------------------------------------------|-----------------------------------------------------------------------|
|               |         | and ambulatory settings.                                                                                                                                     |                                                                           | was database inception-2013)                                                                                                                                                |                                                                       |
| Kastner, 2019 | Canada  | To understand how and why effective multi-chronic disease management interventions influence health outcomes.                                                | Older adults ≥65 years with two or more chronic conditions                | Realist review (106 primary quantitative, qualitative, and mixed-method studies were included; the publication date limitation was database inception-2011)                 | Healthcare                                                            |
| Søgaard, 2021 | Denmark | To investigate the effects of patient engagement interventions.                                                                                              | Older patients ≥60 years with two or more coexisting long term conditions | Systematic review (12 primary quantitative observational studies and randomized control studies were included; the publication date limitation was database inception-2020) | Patient engagement and person-centred care (compared with usual care) |
| Boye, 2019    | Denmark | To synthesize how older people with MM experiences integration of health care services and to identify barriers towards continuity of care when multimorbid. | Older people ≥65 years with two or more chronic conditions                | Systematic review (9 primary quantitative and qualitative were included; the publication date limitation was database inception-2018)                                       | Integration of health care services                                   |
| Lupari, 2011  | UK      | To review available literature on research and service evaluation evidence of nurse-led                                                                      | Older persons ≥65 years with MCCs and living at home                      | Systematic review (8 quantitative and qualitative studies, and studies                                                                                                      | Nurse-led case management                                             |

---

---

|                                                    |         |                                                                                                                             |                                                                                                             |                                                                                                                                                                                                  |                                                                                    |
|----------------------------------------------------|---------|-----------------------------------------------------------------------------------------------------------------------------|-------------------------------------------------------------------------------------------------------------|--------------------------------------------------------------------------------------------------------------------------------------------------------------------------------------------------|------------------------------------------------------------------------------------|
|                                                    |         | case management services targeting older people with MCCs in their own homes.                                               |                                                                                                             | involving service evaluation frameworks (compared with usual care) were included; the publication date limitation was database inception-2009)                                                   |                                                                                    |
| Yang, 2022                                         | China   | To evaluate the effectiveness of interventions to improve medication adherence for community-dwelling older people with MM. | 3292 community-dwelling older people ≥60 years with co-occurrence of two or more chronic medical conditions | Systematic review and meta-analysis (9 primary randomized controlled trials and cluster randomized controlled trials were included; the publication date limitation was database inception-2020) | Medication adherence (compared with usual care or any other control interventions) |
| Eriksen, 2020                                      | Denmark | To synthesize qualitative studies exploring medication-related experiences of polypharmacy among patients with MM.          | Multimorbid patients with an average years of 60.                                                           | Systematic review (13 primary qualitative studies were included; the publication date limitation was database inception-2020)                                                                    | Medication-related experience                                                      |
| The American Geriatrics Society Expert Panel, 2016 | USA     | To provide the evidence base to support a definition of person-centered care and its essential elements.                    | Older adults with MCCs and/or functional limitations.                                                       | Systematic search and review+ environmental scan+qualitative interviews+expert consensus                                                                                                         | Person-centered care                                                               |

---

|                   |           |                                                                                                                                                                                                                                                                 |                                                                                                         |                                                                                                                                       |                                                                 |
|-------------------|-----------|-----------------------------------------------------------------------------------------------------------------------------------------------------------------------------------------------------------------------------------------------------------------|---------------------------------------------------------------------------------------------------------|---------------------------------------------------------------------------------------------------------------------------------------|-----------------------------------------------------------------|
| Butterworth, 2019 | UK        | To assess the effects of interventions for older patients with MM aiming to involve them in decision-making about their health care during primary care consultations.                                                                                          | 1879 older patients with MM                                                                             | Systematic review (3 primary randomized controlled trials were included; the publication date limitation was database inception-2018) | Patient involvement in decision making (compared to usual care) |
| Lun, 2021         | Singapore | To identify prescribing guidelines that are available for older adults with MM and to identify cross-cutting themes used in these guidelines.                                                                                                                   | Older adults $\geq 65$ years in outpatient setting with two or more chronic conditions                  | Scoping review (61 guidelines and tools were included; the publication date limitation was 1998-2019)                                 | Prescription management                                         |
| Lee, 2020         | Singapore | To identify the intervention elements that have been adopted to reduce potential inappropriate prescribing in the outpatient setting and determine the behaviour change wheel intervention functions performed by each of the identified intervention elements. | Older adults $\geq 65$ years in outpatient setting with two or more chronic conditions and polypharmacy | Scoping review (80 primary studies were included; the publication date limitation was 1998-2019)                                      | Prescription management                                         |
| Kastner, 2018     | Canada    | To identify effective MM interventions                                                                                                                                                                                                                          | 12579 older adults $\geq 65$ years                                                                      | Systematic review and meta-analysis                                                                                                   | Healthcare                                                      |

|               |         |                                                                                                                                                                                                       |                                                                               |                                                                                          |                                           |
|---------------|---------|-------------------------------------------------------------------------------------------------------------------------------------------------------------------------------------------------------|-------------------------------------------------------------------------------|------------------------------------------------------------------------------------------|-------------------------------------------|
|               |         | compared with a control or usual care strategy for older adults.                                                                                                                                      | have two or more high-burden chronic conditions                               | (25 primary randomized controlled trials; the publication date limitation was 1990-2017) | (compared to usual control or usual care) |
| Lavan, 2016   | Ireland | To examine prescribing errors in the multimorbid older population, and propose potentially feasible strategies to address them.                                                                       | Older people ≥60 years with two or more concurrent chronic medical conditions | Literature review                                                                        | Prescription management                   |
| Kim, 2016     | USA     | To provide guidance to cardiologists and general practitioners about evaluation and management of older adults with cardiovascular diseases and MM.                                                   | Older adults with cardiovascular diseases and other chronic condition(s)      | Literature review                                                                        | Patient-centred care                      |
| Ouellet, 2018 | USA     | To provide a reasoned approach to medication prescribing and deprescribing decisions for older adults with MCCs, which aims to achieve clinical outcomes that matter most to each individual patient. | Older adults ≥65 years with MCCs                                              | Literature review                                                                        | Decision-making about prescription        |

Abbreviations: MM: multimorbidity; USA: the United States; MCCs: multiple chronic conditions; UK: the United Kingdom
